# Supplementary material for: Identification of brain-enriched proteins in the cerebrospinal fluid proteome by LC-MS/MS profiling and mining of the Human Protein Atlas
Source: PubMed Central journal article supplement (PMC4868024; doi:10.1186/s12014-016-9111-3), 2016-05-15
Supplement: 12014_2016_9111_MOESM1_ESM.pdf [file 12014_2016_9111_MOESM1_ESM.pdf]

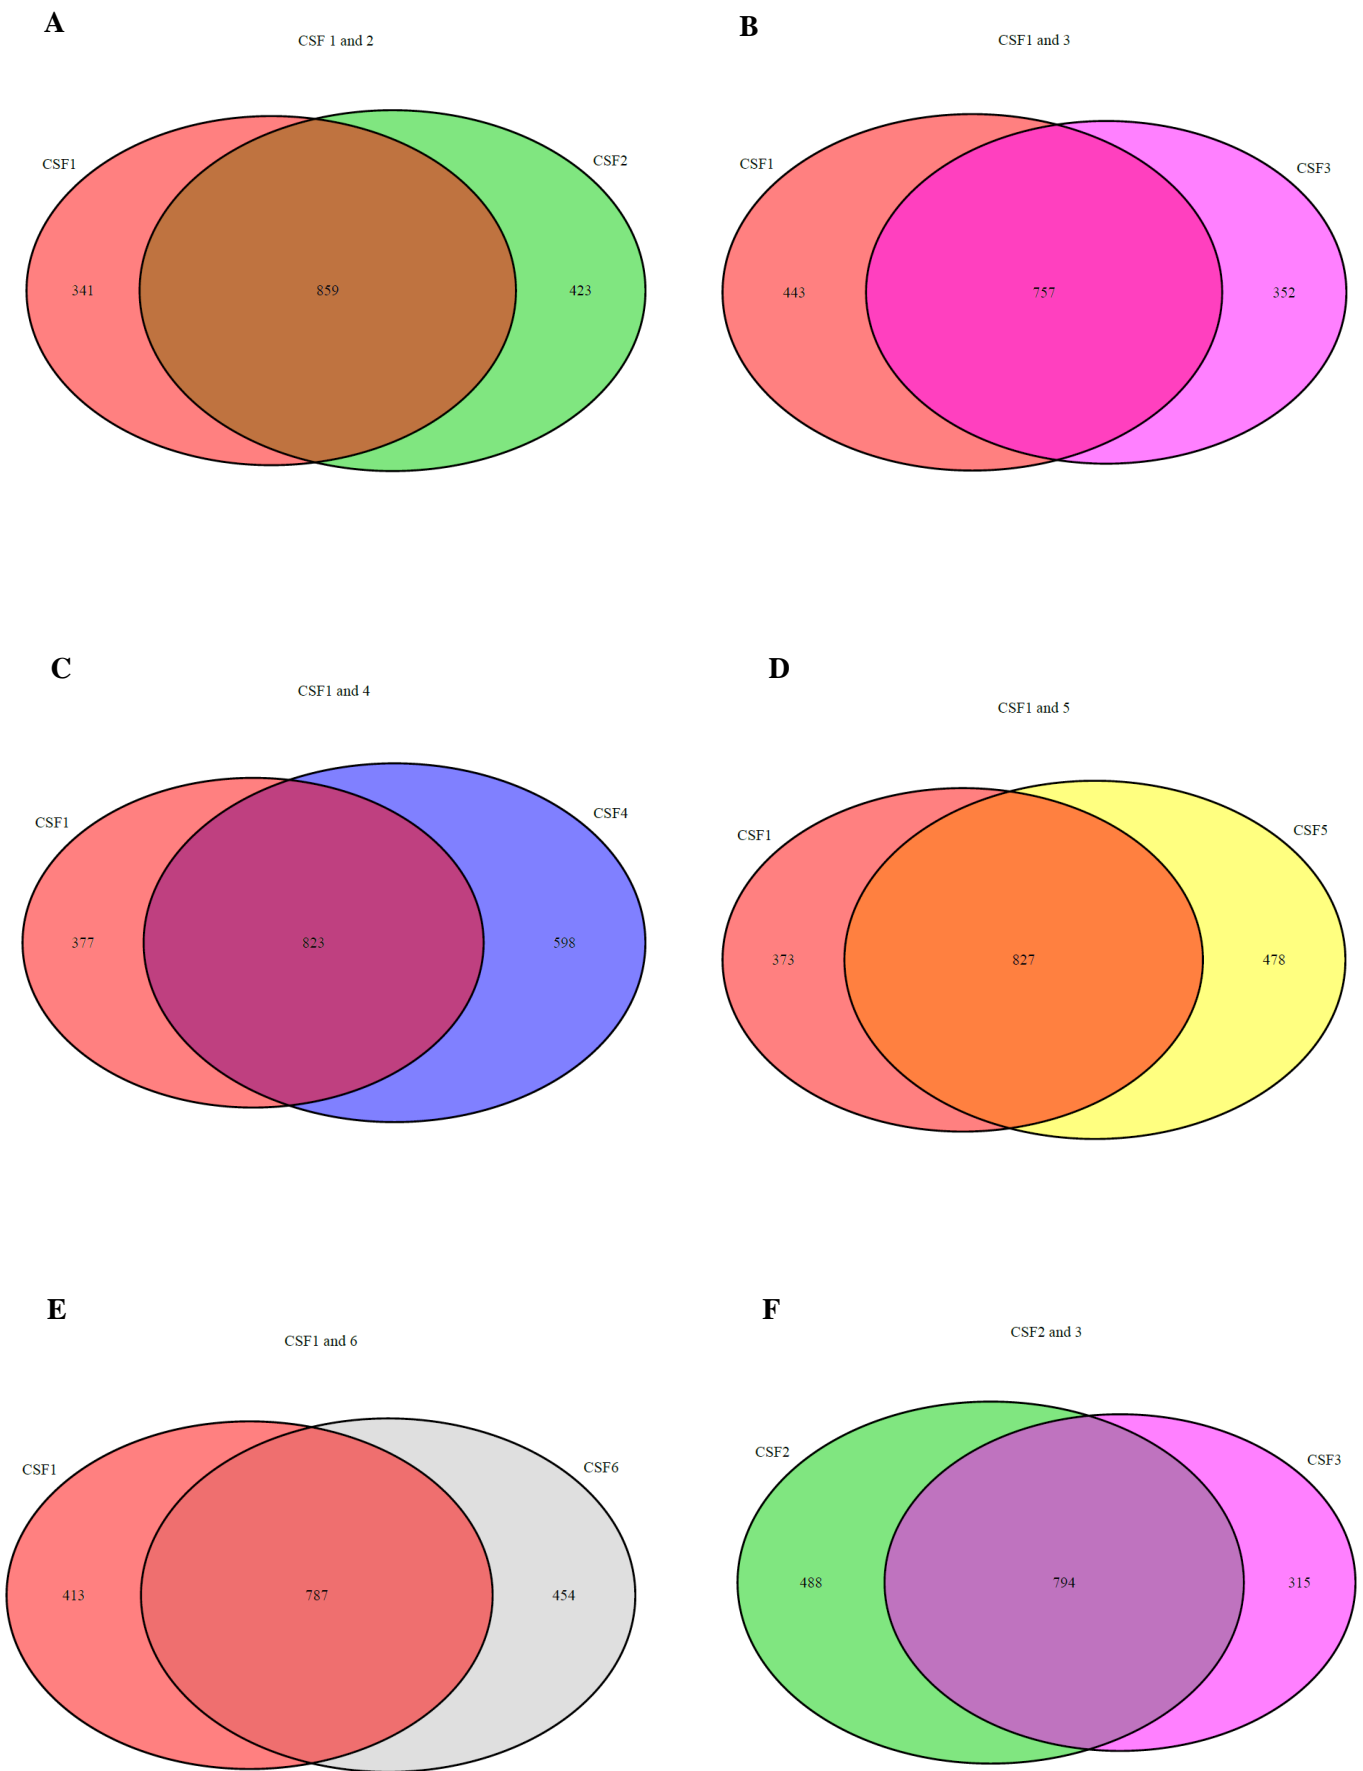

**Additional figure 1.** Proteins common between two samples. Venn diagrams show common proteins between any two individual CSF samples. The average percentage of common proteins was 66.9%.

**G**

CSF2 and 4

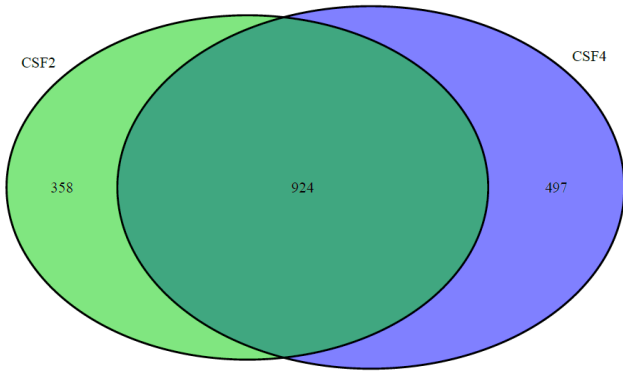**H**

CSF2 and 5

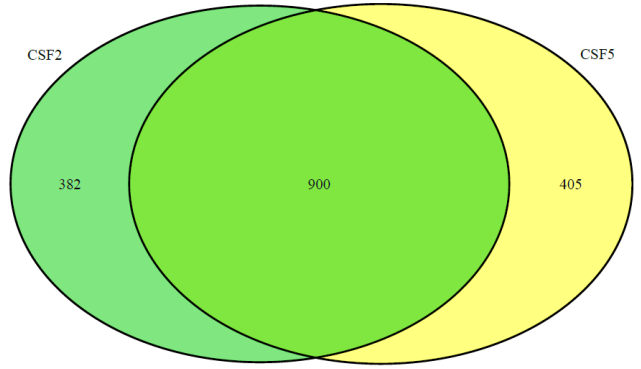**I**

CSF2 and 6

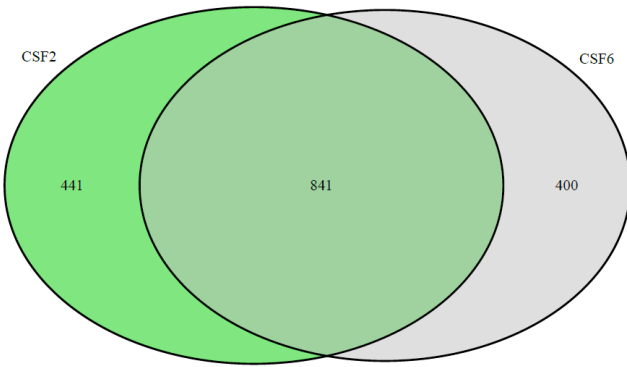**J**

CSF3 and 4

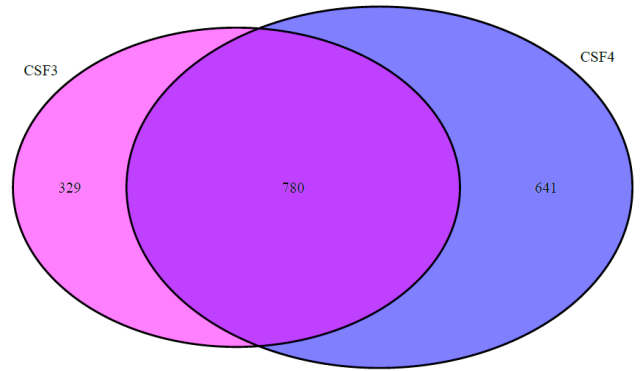**K**

CSF3 and 5

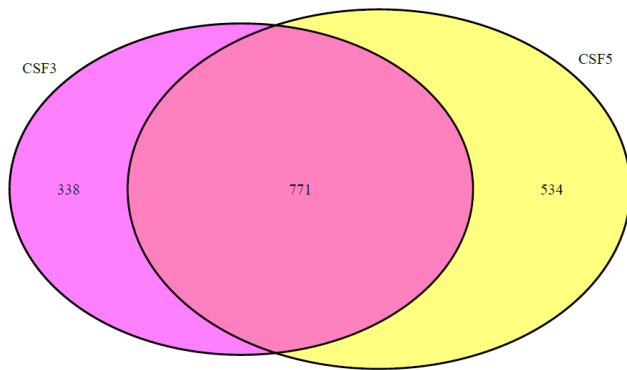**L**

CSF3 and 6

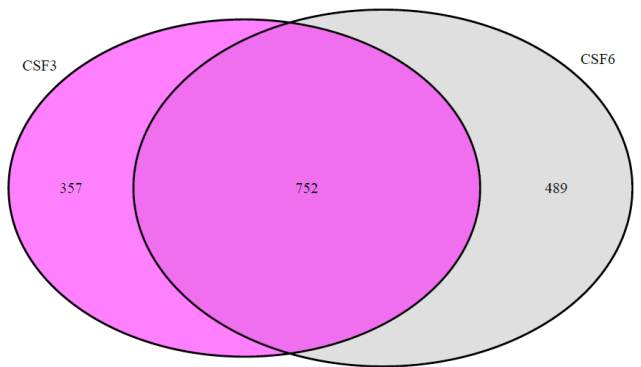**Additional figure 1, continued.**

**M**

CSF5 and 6

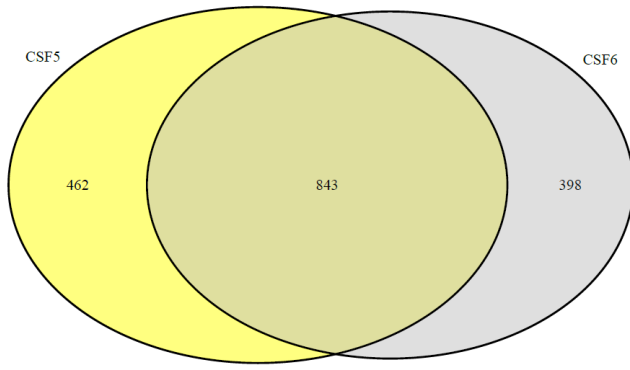

**N**

CSF4 and 5

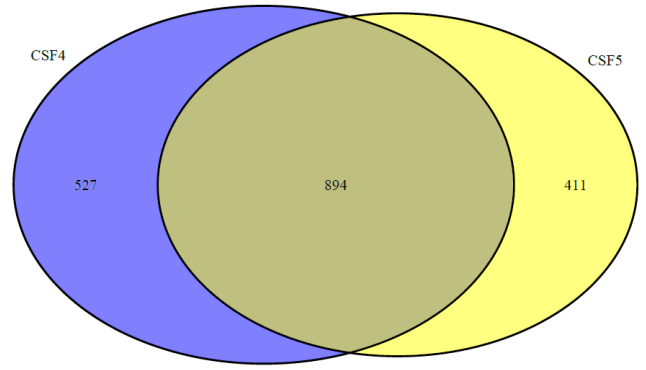

**O**

CSF4 and 6

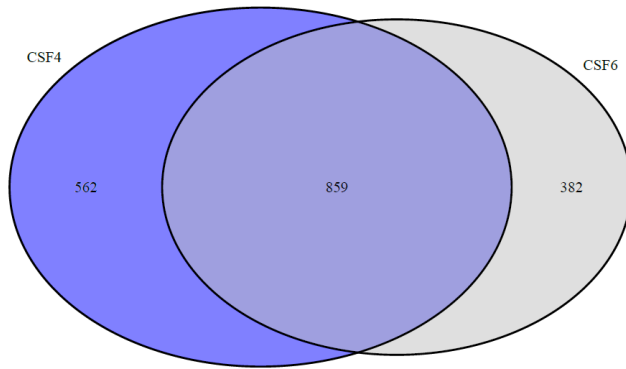

**Additional figure 1, continued.**
