# Supplementary material for: Identification of brain-enriched proteins in the cerebrospinal fluid proteome by LC-MS/MS profiling and mining of the Human Protein Atlas
Source: PubMed Central journal article supplement (PMC4868024; doi:10.1186/s12014-016-9111-3), 2016-05-15
Supplement: 12014_2016_9111_MOESM2_ESM.pdf [file 12014_2016_9111_MOESM2_ESM.pdf]

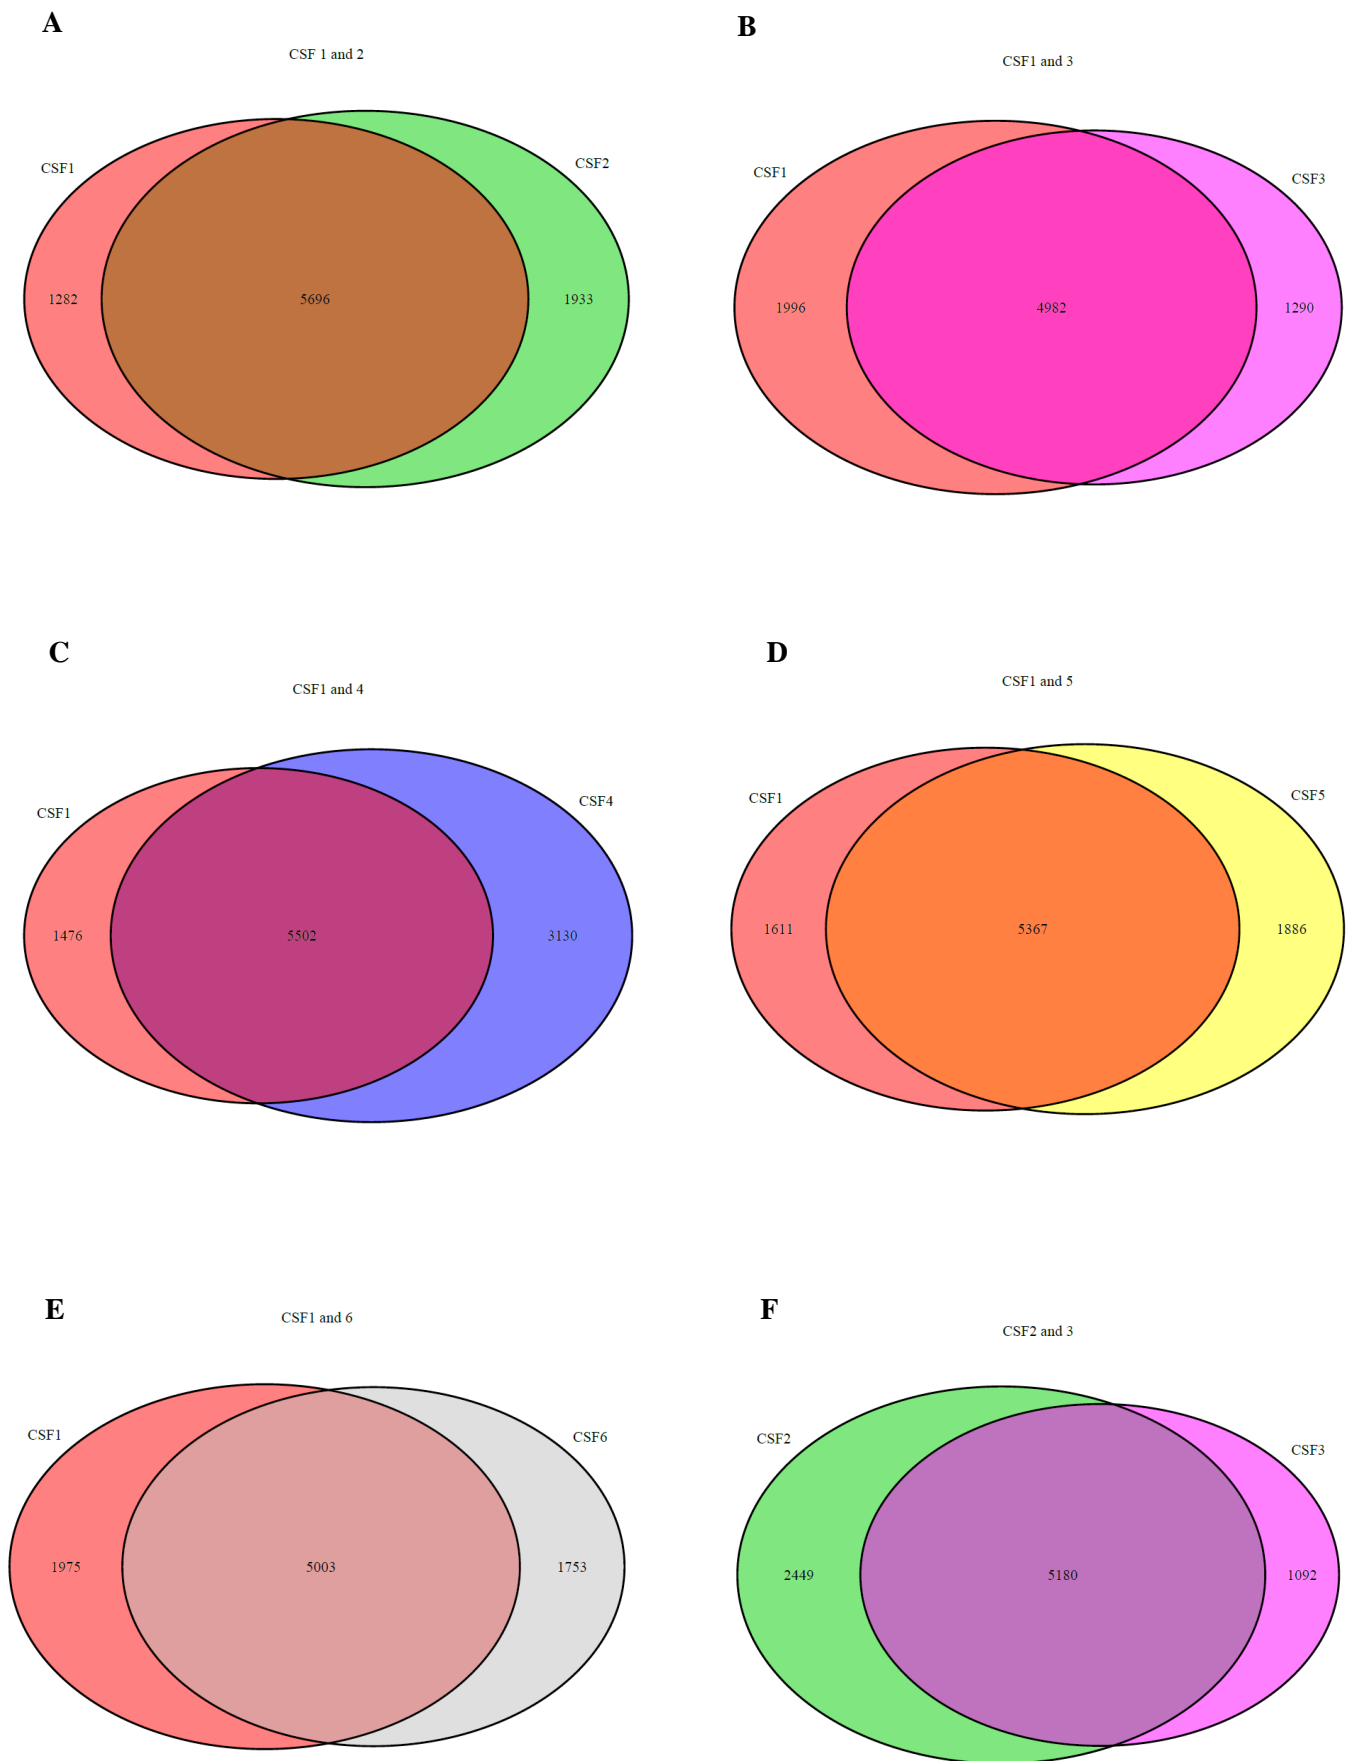

**Additional figure 2.** Peptides common between two samples. Venn diagrams show common proteins between any two individual CSF samples. The average percentage of common peptides was 74%.

**G**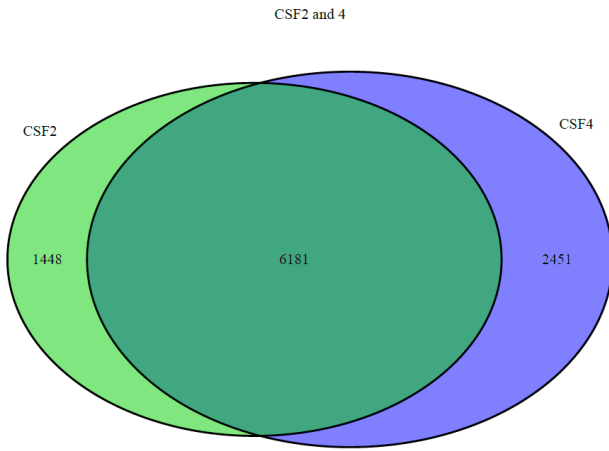**H**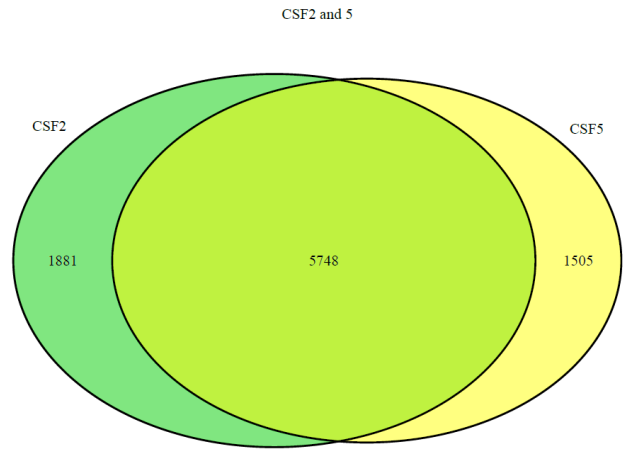**I**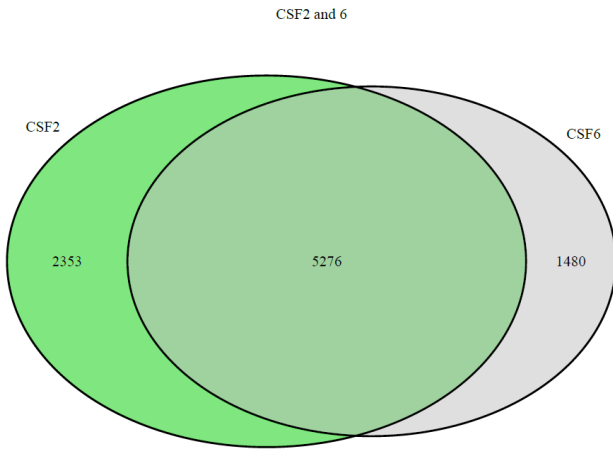**J**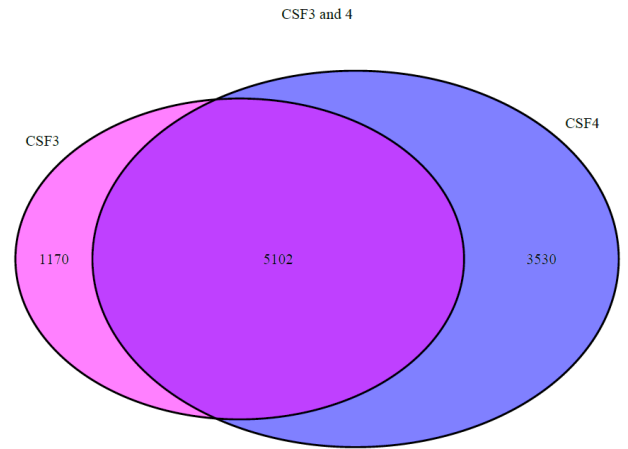**K**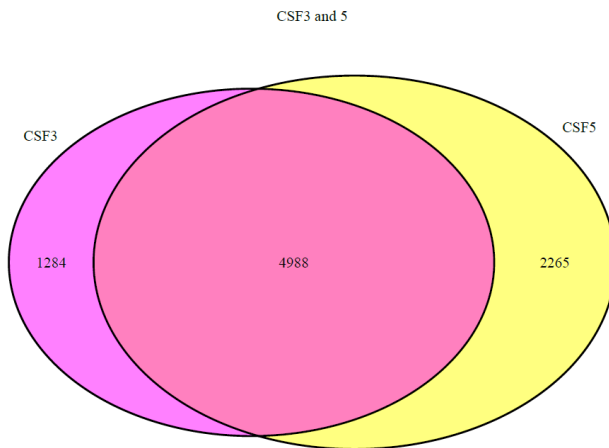**L**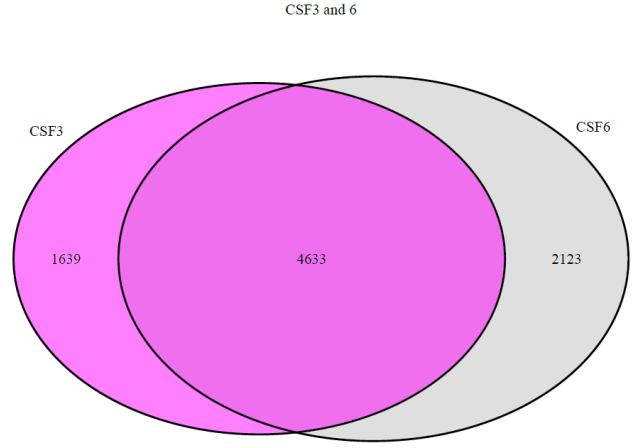**Additional figure 2, continued.**

**M**

CSF5 and 6

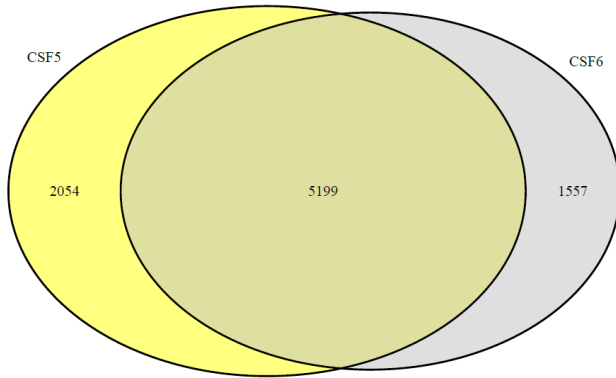

**N**

CSF4 and 5

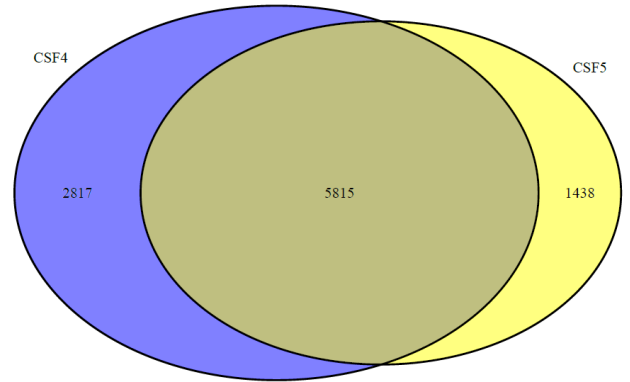

**O**

CSF4 and 6

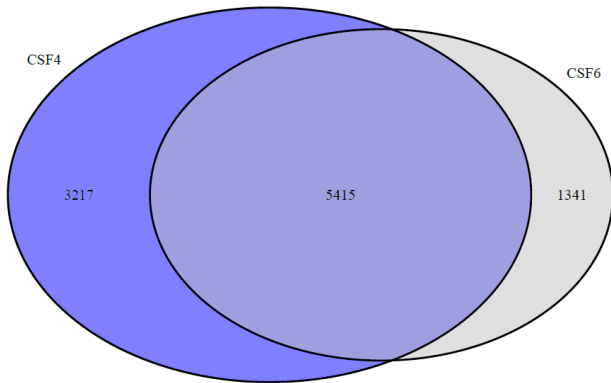

**Additional figure 2, continued.**
